# Supplementary material for: Metabolomics Study of Serum from a Chronic Alcohol-Fed Rat Model Following Administration of Defatted Tenebrio molitor Larva Fermentation Extract
Source: PubMed Central journal article supplement (PMC7693418; doi:10.3390/metabo10110436), 2020-10-29
Supplement: metabolites-10-00436-s001.pdf [file metabolites-10-00436-s001.pdf]

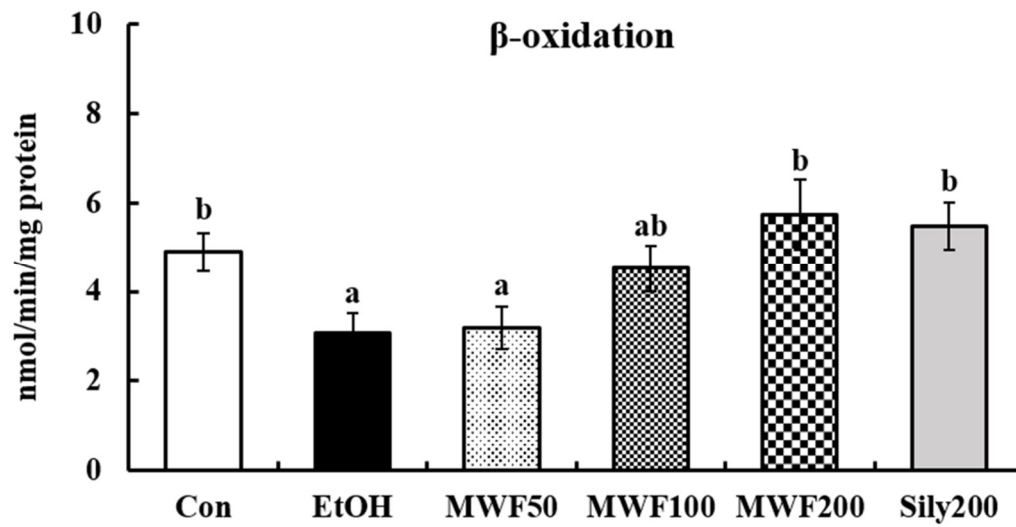

**Supplementary Figure S1. Effects of MWF on the hepatic β-oxidation activity in chronic alcohol-fed rats.** Values was expressed as mean±SE (n=10). Statistical significance was determined by one-way ANOVA, followed by Duncan's multiple range test. Values not sharing a common letter (a, b) above the bars are significantly different among the groups at  $p < 0.05$ .

**Supplementary Table S1. Levels of metabolites in serum from con, EtOH, MWF-50, 100, 200, and sily200 groups**

| No. | Metabolite                                     | Concentration (µg/serum of 50 µL) |               |               |               |               |               | Normalized value <sup>a</sup> |       |        |        |         | p-value <sup>b</sup> |
|-----|------------------------------------------------|-----------------------------------|---------------|---------------|---------------|---------------|---------------|-------------------------------|-------|--------|--------|---------|----------------------|
|     |                                                | Con                               | EtOH          | MWF50         | MWF100        | MWF200        | Sily200       | EtOH                          | MWF50 | MWF100 | MWF200 | Sily200 |                      |
| 1   | Alanine                                        | 2.18 ± 0.32                       | 2.35 ± 0.38   | 2.18 ± 0.39   | 2.23 ± 0.31   | 2.37 ± 0.49   | 2.28 ± 0.42   | 1.08                          | 1.00  | 1.02   | 1.08   | 1.04    | 0.823                |
| 2   | Glycine                                        | 0.63 ± 0.28                       | 0.78 ± 0.25   | 0.84 ± 0.29   | 0.92 ± 0.41   | 1.01 ± 0.26   | 0.83 ± 0.37   | 1.24                          | 1.35  | 1.47   | 1.61   | 1.32    | 0.144                |
| 3   | α-Aminobutyric acid                            | 0.20 ± 0.07                       | 0.16 ± 0.07   | 0.15 ± 0.06   | 0.12 ± 0.07   | 0.14 ± 0.05   | 0.15 ± 0.04   | 0.80                          | 0.75  | 0.63   | 0.72   | 0.75    | 0.191                |
| 4   | Valine                                         | 1.70 ± 0.44                       | 1.91 ± 0.36   | 1.84 ± 0.40   | 2.02 ± 0.36   | 1.78 ± 0.27   | 2.04 ± 0.54   | 1.12                          | 1.08  | 1.19   | 1.05   | 1.20    | 0.373                |
| 5   | Leucine                                        | 1.73 ± 0.31                       | 2.22 ± 0.37   | 1.99 ± 0.37   | 2.23 ± 0.34   | 2.24 ± 0.34   | 2.07 ± 0.30   | 1.29                          | 1.15  | 1.29   | 1.30   | 1.20    | 0.140                |
| 6   | Isoleucine                                     | 2.67 ± 0.62                       | 3.25 ± 0.68   | 2.98 ± 0.58   | 3.25 ± 0.57   | 2.99 ± 0.40   | 2.93 ± 0.42   | 1.22                          | 1.12  | 1.22   | 1.12   | 1.10    | 0.261                |
| 7   | Proline                                        | 1.65 ± 0.43                       | 1.28 ± 0.24   | 1.28 ± 0.28   | 1.20 ± 0.24   | 1.07 ± 0.22   | 1.27 ± 0.23   | 0.78                          | 0.78  | 0.73   | 0.65   | 0.77    | 0.005                |
| 8   | Pipecolic acid                                 | 0.02 ± 0.01                       | 0.02 ± 0.00   | 0.02 ± 0.01   | 0.02 ± 0.01   | 0.02 ± 0.00   | 0.02 ± 0.01   | 0.79                          | 0.86  | 0.77   | 0.66   | 0.73    | 0.079                |
| 9   | Pyroglutamic acid                              | 0.47 ± 0.13                       | 0.62 ± 0.28   | 0.90 ± 0.21   | 1.33 ± 1.14   | 0.98 ± 0.34   | 1.01 ± 0.22   | 1.32                          | 1.92  | 2.85   | 2.09   | 2.16    | <0.001               |
| 10  | Methionine                                     | 0.11 ± 0.03                       | 0.19 ± 0.08   | 0.16 ± 0.11   | 0.14 ± 0.06   | 0.17 ± 0.10   | 0.14 ± 0.06   | 1.69                          | 1.45  | 1.27   | 1.55   | 1.26    | 0.300                |
| 11  | Serine                                         | 3.26 ± 0.48                       | 3.30 ± 0.40   | 3.04 ± 0.51   | 3.15 ± 0.42   | 3.52 ± 0.51   | 3.43 ± 1.28   | 1.01                          | 0.93  | 0.96   | 1.08   | 1.05    | 0.628                |
| 12  | Threonine                                      | 12.09 ± 3.54                      | 10.25 ± 3.74  | 10.32 ± 4.94  | 8.79 ± 3.26   | 9.47 ± 3.14   | 12.65 ± 3.94  | 0.85                          | 0.85  | 0.73   | 0.78   | 1.05    | 0.193                |
| 13  | Phenylalanine                                  | 0.67 ± 0.27                       | 1.15 ± 0.35   | 0.85 ± 0.20   | 1.16 ± 0.41   | 1.30 ± 0.27   | 1.07 ± 0.49   | 1.73                          | 1.28  | 1.74   | 1.95   | 1.60    | 0.001                |
| 14  | Aspartic acid                                  | 0.17 ± 0.10                       | 0.25 ± 0.12   | 0.21 ± 0.09   | 0.29 ± 0.14   | 0.38 ± 0.13   | 0.28 ± 0.25   | 1.44                          | 1.23  | 1.68   | 2.18   | 1.58    | 0.060                |
| 15  | 4-Hydroxyproline                               | 0.58 ± 0.26                       | 0.49 ± 0.14   | 0.60 ± 0.29   | 0.47 ± 0.24   | 0.52 ± 0.27   | 0.76 ± 0.32   | 0.85                          | 1.04  | 0.81   | 0.91   | 1.33    | 0.145                |
| 16  | Pyruvic acid                                   | 1.68 ± 0.38                       | 1.69 ± 0.37   | 1.91 ± 0.44   | 2.00 ± 0.64   | 2.08 ± 0.45   | 1.82 ± 0.35   | 1.01                          | 1.14  | 1.19   | 1.24   | 1.08    | 0.272                |
| 17  | Acetoacetic acid                               | 0.44 ± 0.27                       | 1.18 ± 0.61   | 1.11 ± 0.45   | 1.06 ± 0.55   | 0.97 ± 0.29   | 0.95 ± 0.46   | 2.66                          | 2.52  | 2.40   | 2.20   | 2.15    | 0.007                |
| 18  | Lactic acid                                    | 36.14 ± 5.62                      | 33.72 ± 12.03 | 35.59 ± 7.56  | 37.33 ± 10.45 | 38.05 ± 11.33 | 34.41 ± 6.33  | 0.93                          | 0.98  | 1.03   | 1.05   | 0.95    | 0.897                |
| 19  | Glycolic acid                                  | 4.72 ± 0.73                       | 4.58 ± 0.90   | 5.20 ± 0.80   | 5.06 ± 0.77   | 5.11 ± 0.97   | 5.46 ± 0.72   | 0.97                          | 1.10  | 1.07   | 1.08   | 1.16    | 0.191                |
| 20  | 2-Hydroxybutyric acid                          | 0.14 ± 0.05                       | 0.14 ± 0.09   | 0.16 ± 0.08   | 0.12 ± 0.05   | 0.16 ± 0.05   | 0.16 ± 0.05   | 1.02                          | 1.15  | 0.85   | 1.16   | 1.21    | 0.524                |
| 21  | 3-Hydroxypropionic acid                        | 0.30 ± 0.14                       | 0.39 ± 0.12   | 0.55 ± 0.18   | 0.57 ± 0.14   | 0.59 ± 0.16   | 0.67 ± 0.11   | 1.31                          | 1.88  | 1.94   | 2.01   | 2.25    | <0.001               |
| 22  | 3-Hydroxybutyric acid                          | 0.26 ± 0.17                       | 1.67 ± 0.70   | 3.53 ± 2.62   | 3.58 ± 1.60   | 4.59 ± 1.83   | 4.79 ± 1.87   | 6.48                          | 13.67 | 13.87  | 17.77  | 18.53   | <0.001               |
| 23  | Succinic acid                                  | 1.03 ± 0.40                       | 1.45 ± 0.48   | 1.45 ± 0.31   | 1.67 ± 0.45   | 1.55 ± 0.49   | 1.63 ± 0.61   | 1.41                          | 1.41  | 1.62   | 1.50   | 1.58    | 0.054                |
| 24  | Fumaric acid                                   | 0.03 ± 0.01                       | 0.04 ± 0.02   | 0.04 ± 0.02   | 0.04 ± 0.02   | 0.04 ± 0.01   | 0.04 ± 0.01   | 1.10                          | 1.06  | 1.15   | 1.21   | 1.06    | 0.897                |
| 25  | Oxaloacetic acid                               | 0.02 ± 0.00                       | 0.06 ± 0.01   | 0.05 ± 0.02   | 0.05 ± 0.02   | 0.04 ± 0.02   | 0.04 ± 0.01   | 2.62                          | 2.36  | 2.30   | 2.03   | 1.82    | <0.001               |
| 26  | α-Ketoglutaric acid                            | 0.20 ± 0.04                       | 0.39 ± 0.10   | 0.31 ± 0.08   | 0.34 ± 0.12   | 0.33 ± 0.14   | 0.32 ± 0.10   | 1.94                          | 1.55  | 1.71   | 1.67   | 1.60    | 0.005                |
| 27  | 4-Hydroxyphenylacetic acid                     | 0.002 ± 0.001                     | 0.002 ± 0.001 | 0.003 ± 0.001 | 0.003 ± 0.001 | 0.004 ± 0.004 | 0.002 ± 0.000 | 0.92                          | 1.05  | 1.07   | 1.59   | 0.83    | 0.221                |
| 28  | Malic acid                                     | 0.13 ± 0.08                       | 0.13 ± 0.07   | 0.13 ± 0.07   | 0.17 ± 0.10   | 0.19 ± 0.09   | 0.15 ± 0.07   | 1.00                          | 1.00  | 1.35   | 1.52   | 1.16    | 0.308                |
| 29  | 2-Hydroxyglutaric acid                         | 0.09 ± 0.03                       | 0.10 ± 0.03   | 0.12 ± 0.05   | 0.12 ± 0.03   | 0.14 ± 0.03   | 0.11 ± 0.02   | 1.05                          | 1.31  | 1.28   | 1.49   | 1.19    | 0.063                |
| 30  | cis-Aconitic acid                              | 0.02 ± 0.00                       | 0.02 ± 0.00   | 0.02 ± 0.00   | 0.02 ± 0.00   | 0.02 ± 0.00   | 0.02 ± 0.00   | 1.03                          | 1.08  | 1.08   | 1.07   | 1.07    | 0.223                |
| 31  | Citric acid                                    | 0.26 ± 0.09                       | 0.27 ± 0.08   | 0.30 ± 0.11   | 0.33 ± 0.10   | 0.32 ± 0.09   | 0.30 ± 0.08   | 1.04                          | 1.13  | 1.25   | 1.23   | 1.12    | 0.551                |
| 32  | Isocitric acid                                 | 0.04 ± 0.01                       | 0.04 ± 0.01   | 0.04 ± 0.01   | 0.05 ± 0.01   | 0.05 ± 0.01   | 0.04 ± 0.01   | 1.04                          | 1.06  | 1.10   | 1.10   | 1.07    | 0.684                |
| 33  | Dodecanoic acid (C <sub>12:0</sub> )           | 0.02 ± 0.00                       | 0.02 ± 0.00   | 0.02 ± 0.00   | 0.02 ± 0.00   | 0.02 ± 0.01   | 0.02 ± 0.00   | 0.86                          | 0.80  | 0.94   | 1.00   | 1.00    | 0.130                |
| 34  | Tetradecanoic acid (C <sub>14:0</sub> )        | 0.10 ± 0.03                       | 0.06 ± 0.01   | 0.06 ± 0.02   | 0.07 ± 0.02   | 0.06 ± 0.02   | 0.06 ± 0.01   | 0.59                          | 0.63  | 0.75   | 0.68   | 0.59    | 0.001                |
| 35  | Palmitoleic acid (C <sub>16:1</sub> )          | 0.24 ± 0.09                       | 0.15 ± 0.04   | 0.16 ± 0.05   | 0.20 ± 0.08   | 0.17 ± 0.04   | 0.18 ± 0.04   | 0.64                          | 0.64  | 0.83   | 0.69   | 0.76    | 0.070                |
| 36  | Palmitic acid (C <sub>16:0</sub> )             | 7.73 ± 1.03                       | 7.42 ± 0.64   | 7.82 ± 0.66   | 8.01 ± 0.47   | 7.67 ± 0.47   | 8.57 ± 1.07   | 0.96                          | 1.01  | 1.04   | 0.99   | 1.11    | 0.060                |
| 37  | γ-Linolenic acid (γ-C <sub>18:3</sub> )        | 0.03 ± 0.00                       | 0.02 ± 0.00   | 0.03 ± 0.00   | 0.03 ± 0.00   | 0.03 ± 0.00   | 0.03 ± 0.00   | 0.89                          | 0.99  | 0.98   | 0.91   | 0.99    | 0.204                |
| 38  | Linoleic acid (C <sub>18:2</sub> )             | 3.50 ± 0.70                       | 4.16 ± 0.72   | 4.38 ± 1.10   | 4.31 ± 0.59   | 4.34 ± 0.60   | 4.01 ± 0.67   | 1.19                          | 1.25  | 1.23   | 1.24   | 1.14    | 0.101                |
| 39  | Oleic acid (C <sub>18:1</sub> )                | 6.03 ± 1.55                       | 6.04 ± 0.65   | 5.93 ± 0.93   | 6.35 ± 0.63   | 5.57 ± 0.78   | 6.21 ± 0.97   | 1.00                          | 0.98  | 1.05   | 0.92   | 1.03    | 0.582                |
| 40  | Octadecanoic acid (C <sub>18:0</sub> )         | 7.56 ± 0.62                       | 7.48 ± 0.68   | 8.10 ± 1.00   | 8.68 ± 0.94   | 8.17 ± 0.83   | 9.45 ± 1.27   | 0.99                          | 1.07  | 1.15   | 1.08   | 1.25    | 0.001                |
| 41  | Arachidonic acid (C <sub>20:4</sub> )          | 18.44 ± 3.33                      | 17.54 ± 2.13  | 18.66 ± 2.45  | 20.20 ± 2.08  | 18.72 ± 2.93  | 19.94 ± 3.09  | 0.95                          | 1.01  | 1.10   | 1.01   | 1.08    | 0.262                |
| 42  | 11-Eicosenic acid (C <sub>20:1</sub> )         | 0.13 ± 0.05                       | 0.11 ± 0.04   | 0.09 ± 0.05   | 0.11 ± 0.03   | 0.09 ± 0.04   | 0.10 ± 0.03   | 0.86                          | 0.71  | 0.86   | 0.75   | 0.78    | 0.421                |
| 43  | Eicosadienoic acid (C <sub>20:2</sub> )        | 54.81 ± 19.30                     | 59.08 ± 18.96 | 49.99 ± 19.91 | 53.83 ± 12.20 | 53.01 ± 14.47 | 45.93 ± 9.04  | 1.08                          | 0.91  | 0.98   | 0.97   | 0.84    | 0.581                |
| 44  | Eicosanoic acid (C <sub>20:0</sub> )           | 0.03 ± 0.00                       | 0.03 ± 0.00   | 0.03 ± 0.01   | 0.04 ± 0.00   | 0.03 ± 0.00   | 0.03 ± 0.00   | 1.18                          | 1.20  | 1.28   | 1.15   | 1.08    | <0.001               |
| 45  | Docosahexaenoic acid (DHA, C <sub>22:6</sub> ) | 2.32 ± 0.57                       | 2.12 ± 0.34   | 2.41 ± 0.68   | 2.52 ± 0.53   | 2.65 ± 0.65   | 3.36 ± 0.70   | 0.91                          | 1.04  | 1.09   | 1.14   | 1.45    | 0.002                |
| 46  | Docosatetraenoic acid (C <sub>22:4</sub> )     | 10.33 ± 2.18                      | 9.50 ± 2.34   | 9.86 ± 2.33   | 10.15 ± 2.67  | 10.27 ± 1.57  | 12.02 ± 1.43  | 0.92                          | 0.95  | 0.98   | 0.99   | 1.16    | 0.160                |
| 47  | Erucic acid (C <sub>22:1</sub> )               | 0.01 ± 0.01                       | 0.01 ± 0.00   | 0.02 ± 0.01   | 0.02 ± 0.01   | 0.01 ± 0.00   | 0.01 ± 0.00   | 0.90                          | 1.44  | 1.51   | 0.98   | 0.86    | 0.001                |
| 48  | Docosanoic acid (C <sub>22:0</sub> )           | 0.02 ± 0.00                       | 0.02 ± 0.00   | 0.02 ± 0.00   | 0.02 ± 0.01   | 0.02 ± 0.00   | 0.02 ± 0.00   | 1.04                          | 1.04  | 1.19   | 1.07   | 1.01    | 0.002                |
| 49  | Nervonic acid (C <sub>24:1</sub> )             | 0.02 ± 0.00                       | 0.02 ± 0.00   | 0.02 ± 0.00   | 0.02 ± 0.01   | 0.02 ± 0.00   | 0.02 ± 0.00   | 1.07                          | 1.08  | 1.23   | 1.05   | 1.05    | 0.273                |
| 50  | Tetracosanoic acid (C <sub>24:0</sub> )        | 0.02 ± 0.00                       | 0.02 ± 0.00   | 0.02 ± 0.00   | 0.02 ± 0.01   | 0.02 ± 0.00   | 0.02 ± 0.00   | 1.04                          | 1.03  | 1.25   | 1.05   | 1.04    | 0.003                |
| 51  | Hexacosanoic acid (C <sub>26:0</sub> )         | 0.02 ± 0.00                       | 0.02 ± 0.00   | 0.02 ± 0.00   | 0.02 ± 0.02   | 0.02 ± 0.00   | 0.02 ± 0.01   | 0.95                          | 0.93  | 1.29   | 0.96   | 1.08    | 0.579                |

<sup>a</sup> Values normalized to corresponding control mean values

<sup>b</sup> ANOVA at 95% confidence level
